# Supplementary material for: Effects of Government Spending on Research Workforce Development: Evidence from Biomedical Postdoctoral Researchers
Source: PubMed Central journal article supplement (PMC4416806; doi:10.1371/journal.pone.0124928), 2015-05-01
Supplement: pone.0124928.s002.pdf [file pone.0124928.s002.pdf]

**Table S2. Difference-in-Difference estimates within only government-funded postdocs**

| Change of pre and post of Doubling Funding | Time in Latest Postdoc |                | Time Since Graduation |                | Conference Papers |                | Published Articles |                |
|--------------------------------------------|------------------------|----------------|-----------------------|----------------|-------------------|----------------|--------------------|----------------|
|                                            | Effect                 | Standard error | Effect                | Standard error | Effect            | Standard error | Effect             | Standard error |
| <i>ALL</i>                                 |                        |                |                       |                |                   |                |                    |                |
| Biomedical Field ( $\beta_1$ )             | 0.32                   | 1.6            | -0.08                 | 1.39           | -0.45***          | 0.05           | -0.29***           | 0.05           |
| Doubling Funding ( $\beta_2$ )             | 18.85***               | 3.35           | 70.23***              | 2.92           | -0.17             | 0.11           | 0.11               | 0.11           |
| Difference in Difference ( $\beta_3$ )     | 2.86                   | 2.21           | 4.11**                | 1.93           | 0.1               | 0.07           | 0.08               | 0.07           |
| Observations                               | 2,410                  |                | 2,410                 |                | 2,410             |                | 2,410              |                |
| R-squared / Log likelihood                 | 0.19                   |                | 0.69                  |                | -6965.26          |                | -6571.53           |                |
| <i>US</i>                                  |                        |                |                       |                |                   |                |                    |                |
| Biomedical Field ( $\beta_1$ )             | -1.51                  | 2.02           | 0.08                  | 1.76           | -0.41***          | 0.06           | -0.23***           | 0.06           |
| Doubling Funding ( $\beta_2$ )             | 15.40***               | 4.11           | 65.34***              | 3.58           | -0.01             | 0.12           | 0.13               | 0.12           |
| Difference in Difference ( $\beta_3$ )     | 5.02*                  | 2.8            | 5.03**                | 2.44           | 0.02              | 0.08           | -0.03              | 0.08           |
| Observations                               | 1,798                  |                | 1,798                 |                | 1,798             |                | 1,798              |                |
| R-squared / Log likelihood                 | 0.19                   |                | 0.70                  |                | -5131.57          |                | -4855.63           |                |
| <i>GREEN CARD HOLDER</i>                   |                        |                |                       |                |                   |                |                    |                |
| Biomedical Field ( $\beta_1$ )             | 3.42                   | 2.58           | -0.77                 | 1.45           | -0.66***          | 0.12           | -0.46***           | 0.12           |
| Doubling Funding ( $\beta_2$ )             | 29.87***               | 5.66           | 75.64***              | 3.18           | -0.71**           | 0.29           | -0.08              | 0.26           |
| Difference in Difference ( $\beta_3$ )     | -1.63                  | 4.11           | 1.57                  | 2.31           | 0.62***           | 0.19           | 0.49***            | 0.18           |
| Observations                               | 324                    |                | 324                   |                | 324               |                | 324                |                |
| R-squared / Log likelihood                 | 0.26                   |                | 0.85                  |                | -932.94           |                | -893.79            |                |
| <i>VISA CARD HOLDER</i>                    |                        |                |                       |                |                   |                |                    |                |
| Biomedical Field ( $\beta_1$ )             | 12.35***               | 3.51           | 0.48                  | 2.05           | -0.06             | 0.18           | -0.37**            | 0.18           |
| Doubling Funding ( $\beta_2$ )             | -16.08                 | 15.35          | 72.15***              | 8.98           | -0.24             | 0.76           | -0.82              | 0.8            |
| Difference in Difference ( $\beta_3$ )     | -10.44**               | 4.2            | 0.77                  | 2.46           | -0.23             | 0.22           | 0.37*              | 0.22           |
| Observations                               | 288                    |                | 288                   |                | 288               |                | 288                |                |
| R-squared / Log likelihood                 | 0.19                   |                | 0.72                  |                | -835.65           |                | -771.92            |                |

\*\*\* p&lt;0.01, \*\* p&lt;0.05, \* p&lt;0.1

Control variables include age, gender, race, marriage, children, working hours, research focus, cohorts, time in the last postdoc (only when DV is conference papers or published articles), and institutional rank of the organization where researchers got their first US S&E or health PhD. Source: NSF SESTAT Data, 1995, 2001, and 2003 Survey of Doctorate Recipients (SDR) (sestat.nsf.gov).
